# Supplementary material for: Use of Plasma-Synthesized Nano-Catalysts for CO Hydrogenation in Low-Temperature Fischer–Tropsch Synthesis: Effect of Catalyst Pre-Treatment
Source: MDPI journal article supplement (doi:10.3390/nano8100822), 2018-10-12
Supplement: s1 [file s1]

## Highlights

- Fe, Co and Fe-Co thermal plasma-synthesized formulations as low-T FTS catalysts
- Optimization of the pretreatment protocol of said FTS catalytic formulations
- For Fe catalysts the simultaneous presence of oxides & carbides increases activity
- Catalysts exhibit nearly constant BET specific surface and no sintering over TOS
- H<sub>2</sub>/CO uptake proved to be decreasing over temperature increase
